# Supplementary material for: The synergy of photodeposited CoNi co-catalysts for the photocatalytic performance of C3N4/CdS nanosheets: optimized Gibbs free energy and Co–S bridging bonds
Source: Royal Society of Chemistry journal article supplement (doi:10.1039/d1cy00811k), 2021-01-01
Supplement: d1cy00811k1.pdf [file d1cy00811k1.pdf]

The synergy of photodeposited CoNi co-catalysts for the  
photocatalytic performance of C<sub>3</sub>N<sub>4</sub>/CdS nanosheets: optimized  
Gibbs free energy and Co-S bridging bonds

Qixiao Gai<sup>a,b</sup>, Shoutian Ren<sup>a\*</sup>, Xiaochun Zheng<sup>a,b</sup>, Wenjun Liu<sup>a</sup>, Quanli Dong<sup>a</sup>

<sup>a</sup> Department of Optoelectronic Science, Harbin Institute of Technology at Weihai, Weihai 264209,  
People's Republic of China

<sup>b</sup> Department of Physics, Harbin Institute of Technology, Harbin 150001, People's Republic of  
China

\*Corresponding author:

E-mail address: [renst77@163.com](mailto:renst77@163.com)

## Table of contents

**Table S1** Experimental parameters for loading different co-catalysts on CN/20CS.

**Table S2** Composition of different electrolytes.

**Fig. S1** (a) SEM and (b) TEM images of  $C_3N_4$ , and (c) SEM and (d) TEM images of CdS.

**Fig. S2** (a-e) Element mapping images of CN/20CS-30Co and (f-j) CN/20CS-30Ni.

**Table S3** Co and Ni contents based on the measured AAS results.

**Fig. S3** Rough scan XPS spectra of CN/20CS and CN/20CS-30Co<sub>0.33</sub>Ni<sub>0.67</sub>.

**Table S4** Zeta potential values of CdS and CdS-30Co<sub>0.33</sub>Ni<sub>0.67</sub>.

**Fig. S4** (a) Optical absorption spectra of CoNi and CoNi<sub>3</sub> according to DFT calculation, Tauc plots of (b)  $C_3N_4$  and (c) CdS.

**Table S5** Calculated  $E_{CB}$  and  $E_{VB}$  (vs. NHE) for  $C_3N_4$  and CdS.

**Fig. S5** Time courses of photocatalytic hydrogen production of (a)  $C_3N_4$  and different CN/CS, and (b) those of CN/20CS-Co<sub>0.33</sub>Ni<sub>0.67</sub> for different photodeposition time.

**Fig. S6** The effect of Co/Ni contents in co-catalysts on the photocatalytic hydrogen production amounts of CN/20CS.

**Fig. S7** The AQE of CN/20CS and CN/20CS-30Co<sub>0.33</sub>Ni<sub>0.76</sub> under different monochromatic light excitation.

**Fig. S8** (a) TEM image, (b-g) mapping images of six elements and (h) EDX results of CN/20CS-30Co<sub>0.33</sub>Ni<sub>0.67</sub> after photocatalysis and the inset in panel (b) is the detected sample.

**Fig. S9** XRD patterns of newly prepared CN/20CS-30Co<sub>0.33</sub>Ni<sub>0.67</sub> and after photocatalysis.

**Fig. S10** High-resolution XPS spectra of (a) C 1s, (b) N 1s, (c) Cd 3d, (d) S 2p, (e) Ni 2p and (f) Co 2p of newly prepared CN/20CS-30Co<sub>0.33</sub>Ni<sub>0.67</sub> and after photocatalysis.

Table S1 Experimental parameters for loading different co-catalysts on CN/20CS.

| Precursors<br>Samples                           | CoCl <sub>2</sub> ·6H <sub>2</sub> O<br>(mg) | NiCl <sub>2</sub> ·6H <sub>2</sub> O<br>(mg) | NaH <sub>2</sub> PO <sub>2</sub> ·H <sub>2</sub> O<br>(mg) | Illumination time<br>(min) |
|-------------------------------------------------|----------------------------------------------|----------------------------------------------|------------------------------------------------------------|----------------------------|
| CN/20CS-30Co <sub>0.67</sub> Ni <sub>0.33</sub> | 104.58                                       | 52.29                                        | 48.97                                                      | 30                         |
| CN/20CS-30Co <sub>0.5</sub> Ni <sub>0.5</sub>   | 78.44                                        | 78.44                                        | 48.97                                                      | 30                         |
| CN/20CS-30Co <sub>0.33</sub> Ni <sub>0.67</sub> | 52.29                                        | 104.58                                       | 48.97                                                      | 30                         |
| CN/20CS-20Co <sub>0.33</sub> Ni <sub>0.67</sub> | 52.29                                        | 104.58                                       | 48.97                                                      | 20                         |
| CN/20CS-40Co <sub>0.33</sub> Ni <sub>0.67</sub> | 52.29                                        | 104.58                                       | 48.97                                                      | 40                         |
| CN/20CS-30Co                                    |                                              | 156.88                                       | 48.97                                                      | 30                         |
| CN/20CS-30Ni                                    | 156.88                                       |                                              | 48.97                                                      | 30                         |

Table S2 Composition of different electrolytes.

| Reagent<br>Group | CoCl <sub>2</sub> ·6H <sub>2</sub> O<br>(mg) | NiCl <sub>2</sub> ·6H <sub>2</sub> O<br>(mg) | NaH <sub>2</sub> PO <sub>2</sub> ·H <sub>2</sub> O<br>(mg) | TEO<br>A<br>(mL) | H <sub>2</sub> O<br>(mL) |
|------------------|----------------------------------------------|----------------------------------------------|------------------------------------------------------------|------------------|--------------------------|
| A                |                                              |                                              |                                                            | 8                | 40                       |
| B                | 52.29                                        | 104.58                                       | 48.97                                                      | 8                | 40                       |
| C                | 156.88                                       |                                              | 48.97                                                      | 8                | 40                       |
| D                |                                              | 156.88                                       | 48.97                                                      | 8                | 40                       |

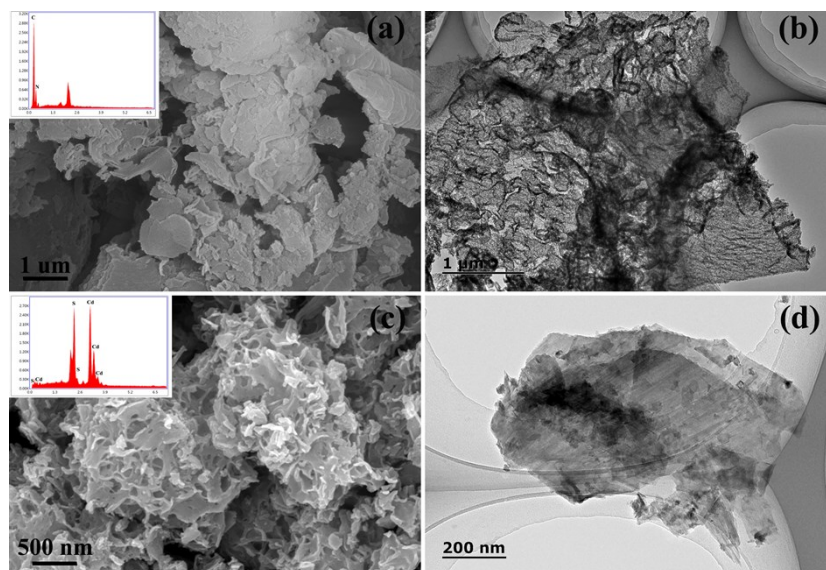

Fig. S1 (a) SEM and (b) TEM images of C<sub>3</sub>N<sub>4</sub>, and (c) SEM and (d) TEM images of CdS. The insets in panel (a) and (c) are the EDX results of C<sub>3</sub>N<sub>4</sub> and CdS, respectively.

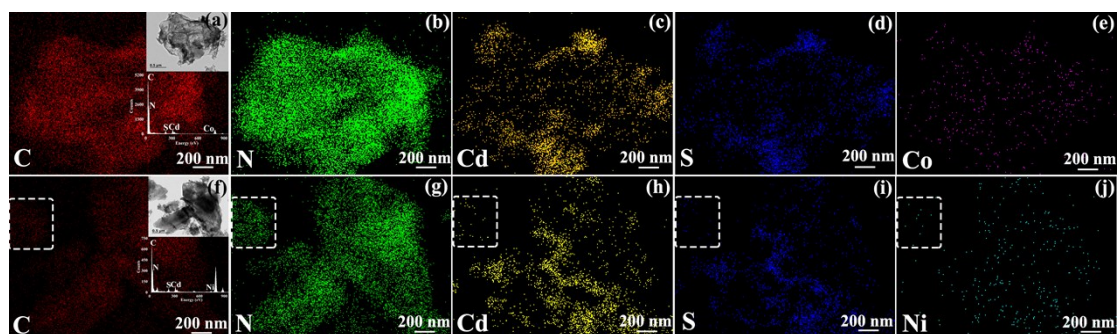

Fig. S2 (a-e) Element mapping images of CN/20CS-30Co and (f-j) CN/20CS-30Ni. The upper and lower insets in panel (a) are the detected sample and EDX images of CN/20CS-30Co, respectively. The upper and lower insets in panel (f) are the detected sample and EDX images of CN/20CS-30Ni, respectively.

Table S3 Co and Ni contents obtained f measured AAS results.

| Catalyst<br>Content<br>(Wt%) | CN/20CS-30Co | CN/20CS-30Co <sub>0.67</sub> Ni <sub>0.33</sub> | CN/20CS-30Co <sub>0.5</sub> Ni <sub>0.5</sub> | CN/20CS-30Co <sub>0.33</sub> Ni <sub>0.67</sub> | CN/20CS-30Ni |
|------------------------------|--------------|-------------------------------------------------|-----------------------------------------------|-------------------------------------------------|--------------|
| Co                           | 1.30         | 0.46                                            | 0.34                                          | 0.22                                            |              |
| Ni                           |              | 0.60                                            | 0.74                                          | 0.85                                            | 1.15         |
| Total                        | 1.30         | 1.06                                            | 1.08                                          | 1.07                                            | 1.15         |

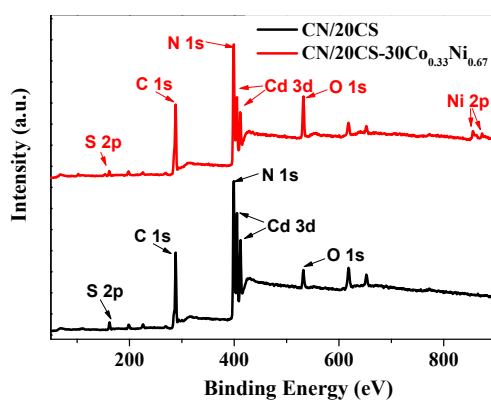

Fig. S3 Rough scan XPS spectra of CN/20CS and CN/20CS-30Co<sub>0.33</sub>Ni<sub>0.67</sub>.

Table S4 Zeta potential values of CdS and CdS-30Co<sub>0.33</sub>Ni<sub>0.67</sub>

| Catalyst<br>Potential value (mV)<br>Number | CdS   | CdS-30Co <sub>0.33</sub> Ni <sub>0.67</sub> |
|--------------------------------------------|-------|---------------------------------------------|
| 1                                          | -19.8 | -13.2                                       |
| 2                                          | -21.7 | -14.8                                       |
| 3                                          | -20.6 | -17.7                                       |
| Average                                    | -20.7 | -15.2                                       |

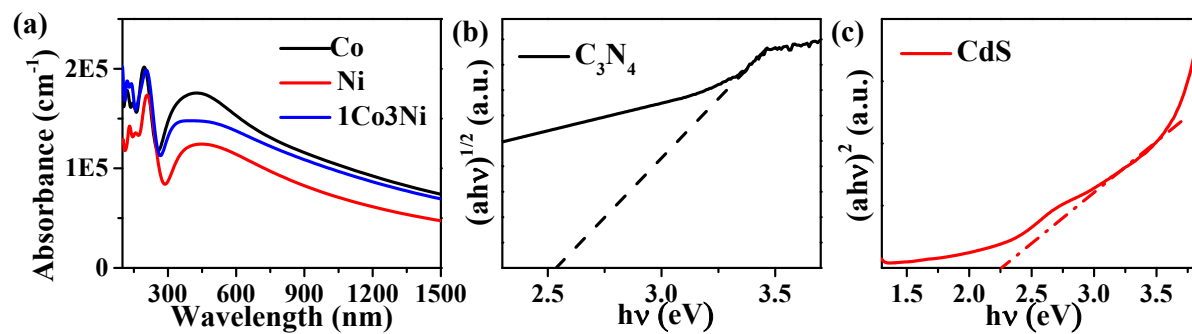

Fig. S4 (a) Optical absorption spectra of CoNi and CoNi3 according to DFT calculation, Tauc plots of (b) C<sub>3</sub>N<sub>4</sub> and (c) CdS.

Table S5 Calculated E<sub>CB</sub> and E<sub>VB</sub> (vs. NHE) for C<sub>3</sub>N<sub>4</sub> and CdS.

| Sample                        | E <sub>g</sub> /eV | E <sub>CB</sub> /eV | E <sub>VB</sub> /eV |
|-------------------------------|--------------------|---------------------|---------------------|
| C <sub>3</sub> N <sub>4</sub> | 2.60               | -1.13               | 1.47                |
| CdS                           | 2.30               | -0.70               | 1.60                |

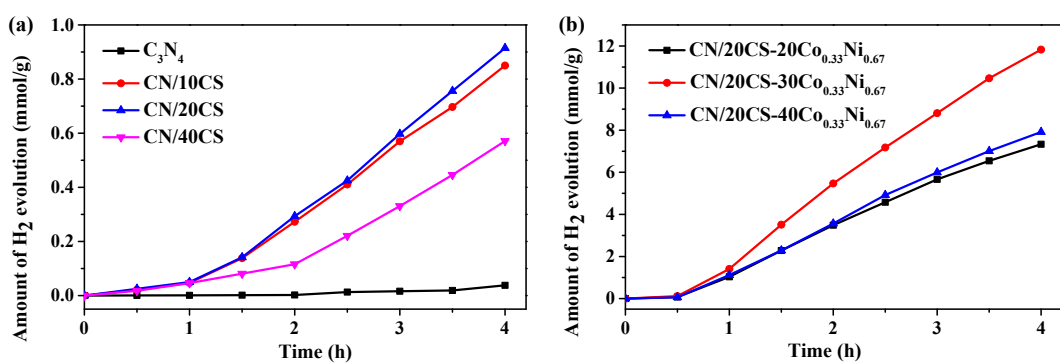

Fig. S5 Time courses of photocatalytic hydrogen production of (a) C<sub>3</sub>N<sub>4</sub> and different CN/CS, and (b) those of CN/20CS-Co<sub>0.33</sub>Ni<sub>0.67</sub> for different photodeposition time.

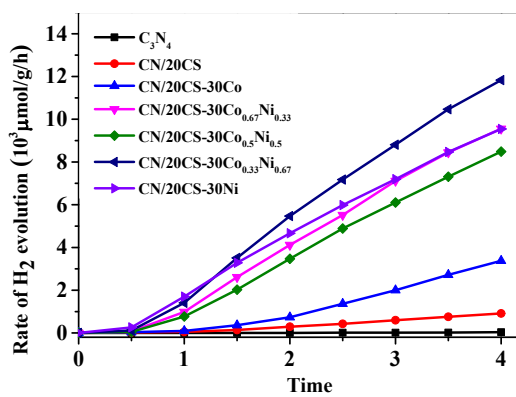

Fig. S6 The effect of Co/Ni contents in co-catalysts on the photocatalytic hydrogen production amounts of CN/20CS.

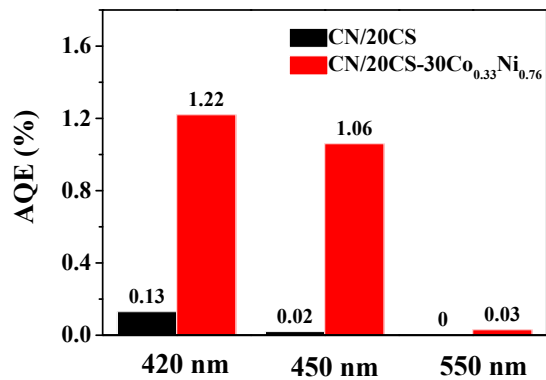

Fig. S7 The AQE of CN/20CS and CN/20CS-30Co<sub>0.33</sub>Ni<sub>0.76</sub> under different monochromatic light excitation.

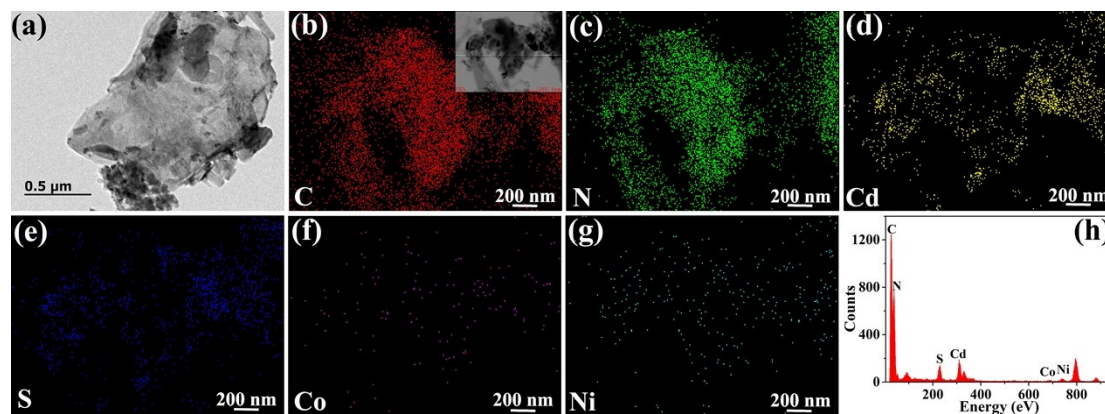

Fig. S8 (a) TEM image, (b-g) mapping images of six elements and (h) EDX results of CN/20CS-30Co<sub>0.33</sub>Ni<sub>0.67</sub> after photocatalysis and the inset in panel (b) is the detected sample.

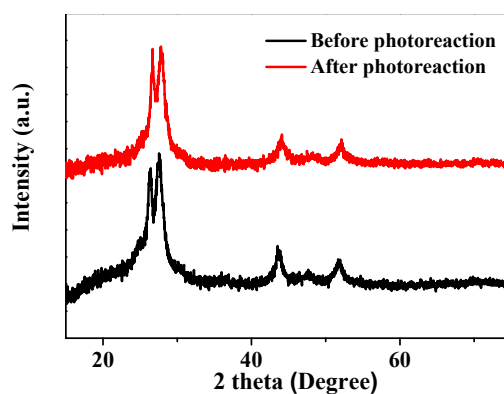

Fig. S9 XRD patterns of newly prepared CN/20CS-30Co<sub>0.33</sub>Ni<sub>0.67</sub> and after photocatalysis.



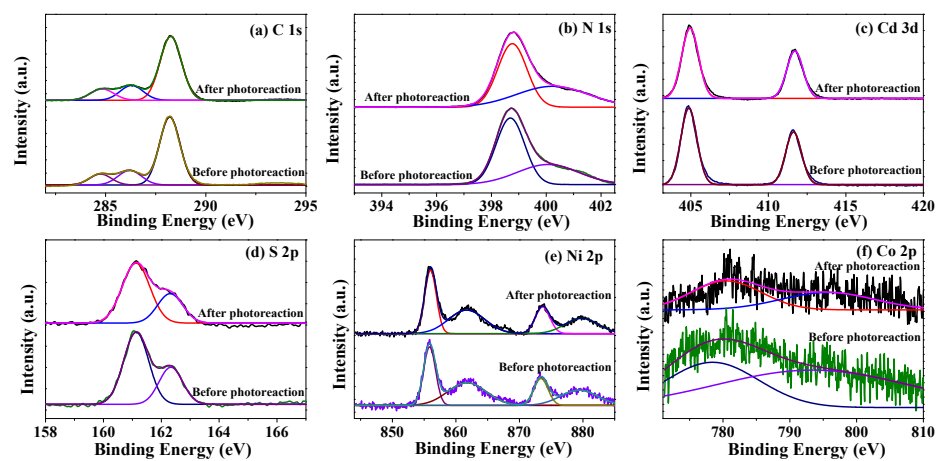

Fig. S10 High-resolution XPS spectra of (a) C 1s, (b) N 1s, (c) Cd 3d, (d) S 2p, (e) Ni 2p and (f) Co 2p of newly prepared CN/20CS-30Co<sub>0.33</sub>Ni<sub>0.67</sub> and after photocatalysis.
